# Supplementary material for: Identifying Functions of Proteins in Mice With Functional Embedding Features
Source: Front Genet. 2022 May 16;13:909040. doi: 10.3389/fgene.2022.909040 (PMC9149260; doi:10.3389/fgene.2022.909040)
Supplement: Supplementary file 4 [file Table1.XLSX]

## Sheet: Sheet1
Rank	Feature
1	N284
2	N84
3	N484
4	W147
5	N317
6	N416
7	N111
8	N249
9	W237
10	N156
11	N64
12	W20
13	N176
14	N370
15	N348
16	N481
17	W63
18	N393
19	N275
20	N274
21	W6
22	N171
23	N316
24	W34
25	N99
26	N160
27	W189
28	N254
29	W79
30	N153
31	N10
32	N260
33	W253
34	N309
35	N75
36	N478
37	N439
38	W199
39	N356
40	N498
41	N182
42	W158
43	N8
44	N143
45	N369
46	W28
47	N62
48	W196
49	N222
50	N459
51	N482
52	W143
53	N81
54	N162
55	N47
56	W73
57	N324
58	N127
59	W53
60	N121
61	N154
62	N432
63	W89
64	N407
65	N434
66	N485
67	W215
68	N80
69	W115
70	N227
71	W17
72	N493
73	N424
74	N41
75	W135
76	N446
77	N97
78	N415
79	N280
80	W231
81	N403
82	N246
83	W19
84	N314
85	N471
86	N462
87	W221
88	N224
89	W125
90	N209
91	W42
92	N174
93	N24
94	N499
95	W31
96	N73
97	N54
98	W165
99	N87
100	N149
101	N290
102	N486
103	N233
104	W192
105	N429
106	W154
107	N226
108	N266
109	N292
110	N229
111	W172
112	N389
113	N489
114	W39
115	N451
116	N53
117	N479
118	N420
119	W120
120	N296
121	W15
122	N453
123	N300
124	N201
125	W105
126	N375
127	N426
128	W68
129	N477
130	N447
131	N444
132	W26
133	N406
134	N265
135	N475
136	W114
137	N287
138	N58
139	N191
140	W27
141	N145
142	N269
143	N142
144	N7
145	N207
146	W96
147	N109
148	N124
149	W121
150	W179
151	N115
152	N100
153	N135
154	N409
155	W255
156	N178
157	N364
158	N450
159	N211
160	W131
161	N52
162	N500
163	N427
164	W12
165	N283
166	W11
167	N239
168	N474
169	N414
170	W184
171	N39
172	N267
173	N255
174	N286
175	W216
176	N244
177	W130
178	N86
179	N18
180	N104
181	N15
182	N460
183	W210
184	N402
185	W250
186	N187
187	N219
188	N188
189	W80
190	N51
191	W98
192	N170
193	N358
194	W119
195	N271
196	W208
197	N332
198	N374
199	N190
200	N245
201	N303
202	N270
203	W24
204	N425
205	N82
206	W206
207	N344
208	N72
209	N495
210	W182
211	N232
212	N463
213	W198
214	N454
215	N456
216	N329
217	W61
218	N103
219	W38
220	N392
221	N251
222	N34
223	W241
224	N167
225	N57
226	N93
227	N26
228	W240
229	N56
230	N21
231	N206
232	W35
233	N169
234	N218
235	N295
236	W244
237	W77
238	N165
239	N216
240	N299
241	N241
242	W81
243	N421
244	W188
245	W256
246	N199
247	N141
248	N161
249	N166
250	N258
251	N418
252	N133
253	N37
254	N343
255	W127
256	N204
257	N90
258	N383
259	N288
260	N362
261	W224
262	N342
263	W9
264	N172
265	W245
266	N105
267	N445
268	W22
269	N106
270	W88
271	N382
272	N385
273	N28
274	W48
275	N396
276	N319
277	N17
278	N458
279	N120
280	W86
281	N257
282	N387
283	N366
284	N205
285	W233
286	N119
287	N2
288	N16
289	W248
290	N59
291	N184
292	W55
293	W100
294	N388
295	N234
296	N440
297	W132
298	N337
299	N379
300	N371
301	N372
302	N448
303	W8
304	N213
305	N101
306	N83
307	W181
308	N134
309	N148
310	N157
311	W40
312	N155
313	N435
314	W235
315	N413
316	N436
317	N277
318	W76
319	N399
320	N136
321	W222
322	N433
323	W1
324	W219
325	N94
326	N85
327	N158
328	W122
329	N464
330	W126
331	N347
332	N336
333	N9
334	N92
335	N373
336	N302
337	W205
338	W49
339	N325
340	N313
341	N452
342	N63
343	N192
344	N36
345	N457
346	W201
347	W10
348	N198
349	N306
350	N384
351	N203
352	W101
353	N23
354	N340
355	N261
356	N42
357	W97
358	N194
359	W226
360	N4
361	N217
362	W112
363	N223
364	N5
365	W139
366	N397
367	N411
368	N240
369	N76
370	N181
371	N69
372	W102
373	N470
374	N70
375	N490
376	N305
377	W197
378	N212
379	N228
380	N272
381	N243
382	W140
383	N386
384	N138
385	N129
386	N377
387	W151
388	N197
389	N123
390	N263
391	N494
392	W128
393	N95
394	N208
395	N465
396	N404
397	W78
398	W190
399	N359
400	W109
401	N231
402	W59
403	W136
404	W94
405	N431
406	N238
407	N449
408	N298
409	N6
410	W193
411	N137
412	W62
413	N422
414	N168
415	N293
416	W243
417	N321
418	N365
419	W54
420	W207
421	N221
422	N294
423	N262
424	W103
425	N3
426	N140
427	W168
428	N466
429	N48
430	W104
431	W110
432	W92
433	N122
434	W71
435	N88
436	N179
437	N247
438	N360
439	N400
440	N180
441	W175
442	W47
443	N363
444	W223
445	N38
446	N55
447	N44
448	N159
449	N307
450	W13
451	N322
452	N22
453	N117
454	W25
455	N497
456	N252
457	N108
458	W60
459	N235
460	W45
461	N310
462	W16
463	N74
464	W249
465	N126
466	N66
467	W111
468	N376
469	N367
470	N210
471	N177
472	W203
473	N312
474	W214
475	N398
476	N327
477	W150
478	N468
479	N173
480	N472
481	N128
482	W246
483	N438
484	N78
485	N338
486	W230
487	N412
488	W67
489	W21
490	N334
491	N112
492	N491
493	W134
494	N308
495	N132
496	N423
497	W29
498	N304
499	W191
500	N381
501	N30
502	N14
503	N248
504	W186
505	N31
506	W56
507	N368
508	N150
509	N20
510	N335
511	W180
512	W225
513	W176
514	W170
515	N144
516	N341
517	W155
518	N391
519	W148
520	N1
521	N12
522	W2
523	N40
524	N480
525	N32
526	W234
527	N345
528	N27
529	N91
530	W217
531	N378
532	W161
533	N77
534	N441
535	W99
536	W33
537	N353
538	W3
539	N220
540	N13
541	W74
542	N250
543	W194
544	N476
545	N380
546	N163
547	W14
548	W204
549	N96
550	N147
551	N455
552	W146
553	N430
554	N488
555	N496
556	N339
557	W84
558	N68
559	W153
560	N35
561	W51
562	N196
563	N401
564	W159
565	N130
566	N467
567	W174
568	N67
569	W142
570	N301
571	W58
572	W43
573	N395
574	N175
575	W252
576	N437
577	W202
578	N11
579	W169
580	W87
581	W209
582	N323
583	W152
584	N195
585	N346
586	N131
587	N320
588	W57
589	W129
590	W187
591	N46
592	N45
593	N281
594	W36
595	W178
596	N225
597	W145
598	W108
599	N19
600	N264
601	N351
602	W213
603	W232
604	W164
605	N483
606	W5
607	W156
608	N164
609	N33
610	W247
611	N326
612	N318
613	W65
614	W157
615	N291
616	N189
617	W227
618	N215
619	N331
620	W166
621	N443
622	N139
623	W141
624	W41
625	N442
626	W72
627	N98
628	N65
629	W37
630	N183
631	N350
632	N114
633	W83
634	N487
635	N79
636	W239
637	W69
638	N242
639	W238
640	W7
641	N273
642	W117
643	N473
644	W85
645	W123
646	N333
647	N29
648	N352
649	W32
650	N146
651	W212
652	N71
653	W177
654	N50
655	N202
656	W82
657	N89
658	N253
659	N102
660	W236
661	N405
662	W228
663	W46
664	N25
665	W251
666	W52
667	N230
668	N410
669	W124
670	N282
671	W185
672	W116
673	N408
674	W118
675	N461
676	N125
677	W144
678	W91
679	N193
680	N355
681	W95
682	W160
683	N330
684	W106
685	N349
686	W200
687	W70
688	W149
689	W162
690	N492
691	N278
692	N328
693	W218
694	N60
695	W133
696	W23
697	N43
698	N259
699	W171
700	N152
701	W242
702	N417
703	W163
704	W220
705	N118
706	N256
707	W50
708	N236
709	N214
710	W18
711	N237
712	N110
713	W64
714	N49
715	N107
716	N361
717	W195
718	W137
719	N469
720	W173
721	N315
722	N394
723	N200
724	N289
725	N297
726	W107
727	N354
728	N113
729	W113
730	N311
731	W254
732	N279
733	N61
734	W4
735	W211
736	N185
737	N116
738	W183
739	N276
740	W75
741	N428
742	W138
743	W66
744	N419
745	W90
746	N285
747	N390
748	N186
749	W93
750	N151
751	W229
752	N268
753	W44
754	N357
755	W167
756	W30
